# Supplementary material
Source: publisher figshare collection journal article supplement (https://tandf.figshare.com/ndownloader/files/9272497)
Supplement: Supplementary file 1 [file 9272497]

## Sheet: Sheet1
SUPPLEMENTARY TABLE 3 - Salmonella typhimurium effectors and their associations to various host proteins from PATRIC database
Uniprot accession (Protein 1)	Uniprot accession (Protein 2)	Gene Name (Protein 1)	Gene Name (Protein 2)	Description (Protien 1)	Description (Protien 2)	Organism (Protein 1)	Organism (Protein 2)	Interaction detection method	Pubmed ID: PMID
P60953	O52623	CDC42	sopE	Cell division control protein 42 homolog (G25K GTP-binding protein)	Guanine nucleotide exchange factor SopE (Effector protein SopE) (Toxin SopE)	Homo sapiens (Human)	Salmonella typhimurium	gdp/gtp exchange assay	12093730
P61077	D0ZVG2	UBE2D3	sspH1	Ubiquitin-conjugating enzyme E2 D3 (EC 2.3.2.23) ((E3-independent) E2 ubiquitin-conjugating enzyme D3) (EC 2.3.2.24) (E2 ubiquitin-conjugating enzyme D3) (Ubiquitin carrier protein D3) (Ubiquitin-conjugating enzyme E2(17)KB 3) (Ubiquitin-conjugating enzyme E2-17 kDa 3) (Ubiquitin-protein ligase D3)	E3 ubiquitin-protein ligase SspH1 (EC 2.3.2.27) (RING-type E3 ubiquitin transferase SspH1) (Salmonella secreted protein H1) (Secreted effector protein SspH1)	Homo sapiens (Human)	Salmonella typhimurium (strain 14028s / SGSC 2262)	ubiquitinase assay	20133640
P61586	A0A0F6B1Q8	RHOA	sseJ	Transforming protein RhoA (Rho cDNA clone 12) (h12)	Secreted effector protein	Homo sapiens (Human)	Salmonella typhimurium (strain 14028s / SGSC 2262)	lipase assay	22740689
Q9BST9	A0A0F6B1Q8	RTKN	sseJ	Rhotekin	Secreted effector protein	Homo sapiens (Human)	Salmonella typhimurium (strain 14028s / SGSC 2262)	lipase assay	22740689
A0A024R1A4	Q8ZNR3	UBE2L3	sopA	Ubiquitin-conjugating enzyme E2L 3, isoform CRA_a	E3 ubiquitin-protein ligase SopA (EC 2.3.2.26) (HECT-type E3 ubiquitin transferase SopA) (Salmonella outer protein A) (Secreted effector protein SopA)	Homo sapiens (Human)	Salmonella typhimurium (strain LT2 / SGSC1412 / ATCC 700720)	fluorescence polarization spectroscopy	18066077
A0A024R1A4	Q8ZNR3	UBE2L3	sopA	Ubiquitin-conjugating enzyme E2L 3, isoform CRA_a	E3 ubiquitin-protein ligase SopA (EC 2.3.2.26) (HECT-type E3 ubiquitin transferase SopA) (Salmonella outer protein A) (Secreted effector protein SopA)	Homo sapiens (Human)	Salmonella typhimurium (strain LT2 / SGSC1412 / ATCC 700720)	pull down	18066077
P08134	Q9FD10	RHOC	sseJ	Rho-related GTP-binding protein RhoC (Rho cDNA clone 9) (h9)	Secreted effector protein SseJ (EC 3.-.-.-) (Salmonella-translocated effector J) (STE J)	Homo sapiens (Human)	Salmonella typhimurium (strain LT2 / SGSC1412 / ATCC 700720)	molecular sieving	19887681
P22059	Q8ZNG2	OSBP	sseL	Oxysterol-binding protein 1	Deubiquitinase SseL (EC 3.4.22.-) (Deubiquitinating enzyme) (DUB) (Deubiquitinating protease) (Salmonella secreted effector L)	Homo sapiens (Human)	Salmonella typhimurium (strain LT2 / SGSC1412 / ATCC 700720)	anti bait coimmunoprecipitation	21988961
P22059	Q8ZNG2	OSBP	sseL	Oxysterol-binding protein 1	Deubiquitinase SseL (EC 3.4.22.-) (Deubiquitinating enzyme) (DUB) (Deubiquitinating protease) (Salmonella secreted effector L)	Homo sapiens (Human)	Salmonella typhimurium (strain LT2 / SGSC1412 / ATCC 700720)	anti tag coimmunoprecipitation	21988961
P51151	Q56061	RAB9A	sifA	Ras-related protein Rab-9A	Secreted effector protein SifA	Homo sapiens (Human)	Salmonella typhimurium (strain LT2 / SGSC1412 / ATCC 700720)	pull down	18787122
P60953	P74873	CDC42	sptP	Cell division control protein 42 homolog (G25K GTP-binding protein)	Secreted effector protein SptP [Includes: GTPase-activating protein (GAP); Tyrosine-protein phosphatase (EC 3.1.3.48)]	Homo sapiens (Human)	Salmonella typhimurium (strain LT2 / SGSC1412 / ATCC 700720)	anti tag coimmunoprecipitation	21435037
P60953	Q7CQD4	CDC42	sopE2	Cell division control protein 42 homolog (G25K GTP-binding protein)	Guanine nucleotide exchange factor sopE2 (Effector protein sopE2) (Toxin sopE2)	Homo sapiens (Human)	Salmonella typhimurium (strain LT2 / SGSC1412 / ATCC 700720)	anti tag coimmunoprecipitation	21435037
P61077	P0CE12	UBE2D3	sspH2	Ubiquitin-conjugating enzyme E2 D3 (EC 2.3.2.23) ((E3-independent) E2 ubiquitin-conjugating enzyme D3) (EC 2.3.2.24) (E2 ubiquitin-conjugating enzyme D3) (Ubiquitin carrier protein D3) (Ubiquitin-conjugating enzyme E2(17)KB 3) (Ubiquitin-conjugating enzyme E2-17 kDa 3) (Ubiquitin-protein ligase D3)	E3 ubiquitin-protein ligase SspH2 (EC 2.3.2.27) (RING-type E3 ubiquitin transferase SspH2) (Salmonella secreted protein H2) (Secreted effector protein sspH2)	Homo sapiens (Human)	Salmonella typhimurium (strain LT2 / SGSC1412 / ATCC 700720)	ubiquitinase assay	20133640
P61586	Q9FD10	RHOA	sseJ	Transforming protein RhoA (Rho cDNA clone 12) (h12)	Secreted effector protein SseJ (EC 3.-.-.-) (Salmonella-translocated effector J) (STE J)	Homo sapiens (Human)	Salmonella typhimurium (strain LT2 / SGSC1412 / ATCC 700720)	fluorescence microscopy	19887681
P61586	Q9FD10	RHOA	sseJ	Transforming protein RhoA (Rho cDNA clone 12) (h12)	Secreted effector protein SseJ (EC 3.-.-.-) (Salmonella-translocated effector J) (STE J)	Homo sapiens (Human)	Salmonella typhimurium (strain LT2 / SGSC1412 / ATCC 700720)	imaging technique	19887681
P61586	Q9FD10	RHOA	sseJ	Transforming protein RhoA (Rho cDNA clone 12) (h12)	Secreted effector protein SseJ (EC 3.-.-.-) (Salmonella-translocated effector J) (STE J)	Homo sapiens (Human)	Salmonella typhimurium (strain LT2 / SGSC1412 / ATCC 700720)	molecular sieving	19887681
P63000	P74873	RAC1	sptP	Ras-related C3 botulinum toxin substrate 1 (Cell migration-inducing gene 5 protein) (Ras-like protein TC25) (p21-Rac1)	Secreted effector protein SptP [Includes: GTPase-activating protein (GAP); Tyrosine-protein phosphatase (EC 3.1.3.48)]	Homo sapiens (Human)	Salmonella typhimurium (strain LT2 / SGSC1412 / ATCC 700720)	x-ray crystallography	11163217
P68036	Q8ZNR3	UBE2L3	sopA	Ubiquitin-conjugating enzyme E2 L3 (EC 2.3.2.23) (E2 ubiquitin-conjugating enzyme L3) (L-UBC) (UbcH7) (Ubiquitin carrier protein L3) (Ubiquitin-conjugating enzyme E2-F1) (Ubiquitin-protein ligase L3)	E3 ubiquitin-protein ligase SopA (EC 2.3.2.26) (HECT-type E3 ubiquitin transferase SopA) (Salmonella outer protein A) (Secreted effector protein SopA)	Homo sapiens (Human)	Salmonella typhimurium (strain LT2 / SGSC1412 / ATCC 700720)	fluorescence polarization spectroscopy	18066077
P68036	Q8ZNR3	UBE2L3	sopA	Ubiquitin-conjugating enzyme E2 L3 (EC 2.3.2.23) (E2 ubiquitin-conjugating enzyme L3) (L-UBC) (UbcH7) (Ubiquitin carrier protein L3) (Ubiquitin-conjugating enzyme E2-F1) (Ubiquitin-protein ligase L3)	E3 ubiquitin-protein ligase SopA (EC 2.3.2.26) (HECT-type E3 ubiquitin transferase SopA) (Salmonella outer protein A) (Secreted effector protein SopA)	Homo sapiens (Human)	Salmonella typhimurium (strain LT2 / SGSC1412 / ATCC 700720)	pull down	18066077
Q9Y2Z0	A0A0H3NF38	SUGT1	sspH2	Protein SGT1 homolog (Protein 40-6-3) (Sgt1) (Suppressor of G2 allele of SKP1 homolog)	Type III secretion system effector protein-E3 Ubiquitin ligase	Homo sapiens (Human)	Salmonella typhimurium (strain SL1344)	anti tag coimmunoprecipitation	23935490
P28482	E0D8C2	MAPK1	spvC	Mitogen-activated protein kinase 1 (MAP kinase 1) (MAPK 1) (EC 2.7.11.24) (ERT1) (Extracellular signal-regulated kinase 2) (ERK-2) (MAP kinase isoform p42) (p42-MAPK) (Mitogen-activated protein kinase 2) (MAP kinase 2) (MAPK 2)	Hydrophilic protein (Salmonella plasmid virulence protein C) (SpvC) (Virulence protein)	Homo sapiens (Human)	Salmonella typhimurium	phosphatase assay	18084305
A0A024RAE4	O52623	CDC42	sopE	Cell division cycle 42 (GTP binding protein, 25kDa), isoform CRA_a	Guanine nucleotide exchange factor SopE (Effector protein SopE) (Toxin SopE)	Homo sapiens (Human)	Salmonella typhimurium	gdp/gtp exchange assay	12093730
A0A024RAE4	O52623	CDC42	sopE	Cell division cycle 42 (GTP binding protein, 25kDa), isoform CRA_a	Guanine nucleotide exchange factor SopE (Effector protein SopE) (Toxin SopE)	Homo sapiens (Human)	Salmonella typhimurium	x-ray crystallography	12093730
P60953	O52623	CDC42	sopE	Cell division control protein 42 homolog (G25K GTP-binding protein)	Guanine nucleotide exchange factor SopE (Effector protein SopE) (Toxin SopE)	Homo sapiens (Human)	Salmonella typhimurium	enzymatic study	12093730
P60953	O52623	CDC42	sopE	Cell division control protein 42 homolog (G25K GTP-binding protein)	Guanine nucleotide exchange factor SopE (Effector protein SopE) (Toxin SopE)	Homo sapiens (Human)	Salmonella typhimurium	Other Methods	12093730
P60953	O52623	CDC42	sopE	Cell division control protein 42 homolog (G25K GTP-binding protein)	Guanine nucleotide exchange factor SopE (Effector protein SopE) (Toxin SopE)	Homo sapiens (Human)	Salmonella typhimurium	x-ray crystallography	12093730
Q8IWE5	A0A0F6B063	PLEKHM2	sifA	Pleckstrin homology domain-containing family M member 2 (PH domain-containing family M member 2) (Salmonella-induced filaments A and kinesin-interacting protein) (SifA and kinesin-interacting protein)	Secreted effector protein	Homo sapiens (Human)	Salmonella typhimurium (strain 14028s / SGSC 2262)	anti tag coimmunoprecipitation	18996344
Q8IWE5	A0A0F6B063	PLEKHM2	sifA	Pleckstrin homology domain-containing family M member 2 (PH domain-containing family M member 2) (Salmonella-induced filaments A and kinesin-interacting protein) (SifA and kinesin-interacting protein)	Secreted effector protein	Homo sapiens (Human)	Salmonella typhimurium (strain 14028s / SGSC 2262)	confocal microscopy	18996344
Q8IWE5	A0A0F6B063	PLEKHM2	sifA	Pleckstrin homology domain-containing family M member 2 (PH domain-containing family M member 2) (Salmonella-induced filaments A and kinesin-interacting protein) (SifA and kinesin-interacting protein)	Secreted effector protein	Homo sapiens (Human)	Salmonella typhimurium (strain 14028s / SGSC 2262)	isothermal titration calorimetry	18996344
P61586	A0A0F6B1Q8	RHOA	sseJ	Transforming protein RhoA (Rho cDNA clone 12) (h12)	Secreted effector protein	Homo sapiens (Human)	Salmonella typhimurium (strain 14028s / SGSC 2262)	fluorescence microscopy	22740689
P61586	A0A0F6B1Q8	RHOA	sseJ	Transforming protein RhoA (Rho cDNA clone 12) (h12)	Secreted effector protein	Homo sapiens (Human)	Salmonella typhimurium (strain 14028s / SGSC 2262)	nuclear magnetic resonance	22740689
P61586	A0A0F6B1Q8	RHOA	sseJ	Transforming protein RhoA (Rho cDNA clone 12) (h12)	Secreted effector protein	Homo sapiens (Human)	Salmonella typhimurium (strain 14028s / SGSC 2262)	Other Methods	22740689
P61586	A0A0F6B1Q8	RHOA	sseJ	Transforming protein RhoA (Rho cDNA clone 12) (h12)	Secreted effector protein	Homo sapiens (Human)	Salmonella typhimurium (strain 14028s / SGSC 2262)	pull down	22740689
Q9BST9	A0A0F6B1Q8	RTKN	sseJ	Rhotekin	Secreted effector protein	Homo sapiens (Human)	Salmonella typhimurium (strain 14028s / SGSC 2262)	Other Methods	22740689
P10599	D0ZRB2	TXN	slrP	Thioredoxin (Trx) (ATL-derived factor) (ADF) (Surface-associated sulphydryl protein) (SASP)	E3 ubiquitin-protein ligase SlrP (EC 2.3.2.27) (RING-type E3 ubiquitin transferase SlrP) (Secreted effector protein SlrP)	Homo sapiens (Human)	Salmonella typhimurium (strain 14028s / SGSC 2262)	anti tag coimmunoprecipitation	19690162
P10599	D0ZRB2	TXN	slrP	Thioredoxin (Trx) (ATL-derived factor) (ADF) (Surface-associated sulphydryl protein) (SASP)	E3 ubiquitin-protein ligase SlrP (EC 2.3.2.27) (RING-type E3 ubiquitin transferase SlrP) (Secreted effector protein SlrP)	Homo sapiens (Human)	Salmonella typhimurium (strain 14028s / SGSC 2262)	enzymatic study	19690162
P10599	D0ZRB2	TXN	slrP	Thioredoxin (Trx) (ATL-derived factor) (ADF) (Surface-associated sulphydryl protein) (SASP)	E3 ubiquitin-protein ligase SlrP (EC 2.3.2.27) (RING-type E3 ubiquitin transferase SlrP) (Secreted effector protein SlrP)	Homo sapiens (Human)	Salmonella typhimurium (strain 14028s / SGSC 2262)	pull down	19690162
P10599	D0ZRB2	TXN	slrP	Thioredoxin (Trx) (ATL-derived factor) (ADF) (Surface-associated sulphydryl protein) (SASP)	E3 ubiquitin-protein ligase SlrP (EC 2.3.2.27) (RING-type E3 ubiquitin transferase SlrP) (Secreted effector protein SlrP)	Homo sapiens (Human)	Salmonella typhimurium (strain 14028s / SGSC 2262)	two hybrid	19690162
P62837	D0ZRB2	UBE2D2	slrP	Ubiquitin-conjugating enzyme E2 D2 (EC 2.3.2.23) ((E3-independent) E2 ubiquitin-conjugating enzyme D2) (EC 2.3.2.24) (E2 ubiquitin-conjugating enzyme D2) (Ubiquitin carrier protein D2) (Ubiquitin-conjugating enzyme E2(17)KB 2) (Ubiquitin-conjugating enzyme E2-17 kDa 2) (Ubiquitin-protein ligase D2) (p53-regulated ubiquitin-conjugating enzyme 1)	E3 ubiquitin-protein ligase SlrP (EC 2.3.2.27) (RING-type E3 ubiquitin transferase SlrP) (Secreted effector protein SlrP)	Homo sapiens (Human)	Salmonella typhimurium (strain 14028s / SGSC 2262)	enzymatic study	19690162
P61077	D0ZVG2	UBE2D3	sspH1	Ubiquitin-conjugating enzyme E2 D3 (EC 2.3.2.23) ((E3-independent) E2 ubiquitin-conjugating enzyme D3) (EC 2.3.2.24) (E2 ubiquitin-conjugating enzyme D3) (Ubiquitin carrier protein D3) (Ubiquitin-conjugating enzyme E2(17)KB 3) (Ubiquitin-conjugating enzyme E2-17 kDa 3) (Ubiquitin-protein ligase D3)	E3 ubiquitin-protein ligase SspH1 (EC 2.3.2.27) (RING-type E3 ubiquitin transferase SspH1) (Salmonella secreted protein H1) (Secreted effector protein SspH1)	Homo sapiens (Human)	Salmonella typhimurium (strain 14028s / SGSC 2262)	Other Methods	20133640
P60953	O30916	CDC42	sopB	Cell division control protein 42 homolog (G25K GTP-binding protein)	Inositol phosphate phosphatase SopB (EC 3.1.3.-) (Effector protein SopB)	Homo sapiens (Human)	Salmonella typhimurium (strain LT2 / SGSC1412 / ATCC 700720)	anti tag coimmunoprecipitation	21435037
P60953	O30916	CDC42	sopB	Cell division control protein 42 homolog (G25K GTP-binding protein)	Inositol phosphate phosphatase SopB (EC 3.1.3.-) (Effector protein SopB)	Homo sapiens (Human)	Salmonella typhimurium (strain LT2 / SGSC1412 / ATCC 700720)	pull down	21435037
P28482	P0A2M9	MAPK1	spvC	Mitogen-activated protein kinase 1 (MAP kinase 1) (MAPK 1) (EC 2.7.11.24) (ERT1) (Extracellular signal-regulated kinase 2) (ERK-2) (MAP kinase isoform p42) (p42-MAPK) (Mitogen-activated protein kinase 2) (MAP kinase 2) (MAPK 2)	MAPK phosphothreonine lyase (EC 4.2.3.-) (27.5 kDa virulence protein) (Secreted effector protein SpvC)	Homo sapiens (Human)	Salmonella typhimurium (strain LT2 / SGSC1412 / ATCC 700720)	phosphatase assay	18084305
P61077	P0CE12	UBE2D3	sspH2	Ubiquitin-conjugating enzyme E2 D3 (EC 2.3.2.23) ((E3-independent) E2 ubiquitin-conjugating enzyme D3) (EC 2.3.2.24) (E2 ubiquitin-conjugating enzyme D3) (Ubiquitin carrier protein D3) (Ubiquitin-conjugating enzyme E2(17)KB 3) (Ubiquitin-conjugating enzyme E2-17 kDa 3) (Ubiquitin-protein ligase D3)	E3 ubiquitin-protein ligase SspH2 (EC 2.3.2.27) (RING-type E3 ubiquitin transferase SspH2) (Salmonella secreted protein H2) (Secreted effector protein sspH2)	Homo sapiens (Human)	Salmonella typhimurium (strain LT2 / SGSC1412 / ATCC 700720)	nuclear magnetic resonance	20133640
P61077	P0CE12	UBE2D3	sspH2	Ubiquitin-conjugating enzyme E2 D3 (EC 2.3.2.23) ((E3-independent) E2 ubiquitin-conjugating enzyme D3) (EC 2.3.2.24) (E2 ubiquitin-conjugating enzyme D3) (Ubiquitin carrier protein D3) (Ubiquitin-conjugating enzyme E2(17)KB 3) (Ubiquitin-conjugating enzyme E2-17 kDa 3) (Ubiquitin-protein ligase D3)	E3 ubiquitin-protein ligase SspH2 (EC 2.3.2.27) (RING-type E3 ubiquitin transferase SspH2) (Salmonella secreted protein H2) (Secreted effector protein sspH2)	Homo sapiens (Human)	Salmonella typhimurium (strain LT2 / SGSC1412 / ATCC 700720)	Other Methods	20133640
P62987	P0CE12	UBA52	sspH2	Ubiquitin-60S ribosomal protein L40 (CEP52) (Ubiquitin A-52 residue ribosomal protein fusion product 1) [Cleaved into: Ubiquitin; 60S ribosomal protein L40 (Large ribosomal subunit protein eL40)]	E3 ubiquitin-protein ligase SspH2 (EC 2.3.2.27) (RING-type E3 ubiquitin transferase SspH2) (Salmonella secreted protein H2) (Secreted effector protein sspH2)	Homo sapiens (Human)	Salmonella typhimurium (strain LT2 / SGSC1412 / ATCC 700720)	comigration in sds page	20133640
A4D2P1	P74873	RAC1	sptP	Ras-related C3 botulinum toxin substrate 1 (Rho family, small GTP binding protein Rac1) (Ras-related C3 botulinum toxin substrate 1 (Rho family, small GTP binding protein Rac1), isoform CRA_a) (Ras-related C3 botulinum toxin substrate 1 isoform Rac1) (cDNA FLJ30431 fis, clone BRACE2008968, highly similar to Ras-related C3 botulinum toxin substrate 1) (cDNA FLJ75553, highly similar to Homo sapiens…	Secreted effector protein SptP [Includes: GTPase-activating protein (GAP); Tyrosine-protein phosphatase (EC 3.1.3.48)]	Homo sapiens (Human)	Salmonella typhimurium (strain LT2 / SGSC1412 / ATCC 700720)	x-ray crystallography	11163217
Q8IWE5	Q56061	PLEKHM2	sifA	Pleckstrin homology domain-containing family M member 2 (PH domain-containing family M member 2) (Salmonella-induced filaments A and kinesin-interacting protein) (SifA and kinesin-interacting protein)	Secreted effector protein SifA	Homo sapiens (Human)	Salmonella typhimurium (strain LT2 / SGSC1412 / ATCC 700720)	pull down	18787122
Q8IWE5	Q56061	PLEKHM2	sifA	Pleckstrin homology domain-containing family M member 2 (PH domain-containing family M member 2) (Salmonella-induced filaments A and kinesin-interacting protein) (SifA and kinesin-interacting protein)	Secreted effector protein SifA	Homo sapiens (Human)	Salmonella typhimurium (strain LT2 / SGSC1412 / ATCC 700720)	x-ray crystallography	18996344
P62987	Q8ZNG2	UBA52	sseL	Ubiquitin-60S ribosomal protein L40 (CEP52) (Ubiquitin A-52 residue ribosomal protein fusion product 1) [Cleaved into: Ubiquitin; 60S ribosomal protein L40 (Large ribosomal subunit protein eL40)]	Deubiquitinase SseL (EC 3.4.22.-) (Deubiquitinating enzyme) (DUB) (Deubiquitinating protease) (Salmonella secreted effector L)	Homo sapiens (Human)	Salmonella typhimurium (strain LT2 / SGSC1412 / ATCC 700720)	protease assay	17360673
P62987	Q8ZNG2	UBA52	sseL	Ubiquitin-60S ribosomal protein L40 (CEP52) (Ubiquitin A-52 residue ribosomal protein fusion product 1) [Cleaved into: Ubiquitin; 60S ribosomal protein L40 (Large ribosomal subunit protein eL40)]	Deubiquitinase SseL (EC 3.4.22.-) (Deubiquitinating enzyme) (DUB) (Deubiquitinating protease) (Salmonella secreted effector L)	Homo sapiens (Human)	Salmonella typhimurium (strain LT2 / SGSC1412 / ATCC 700720)	two hybrid	17360673
P0CG48	Q8ZNR3	UBC	sopA	Polyubiquitin-C [Cleaved into: Ubiquitin]	E3 ubiquitin-protein ligase SopA (EC 2.3.2.26) (HECT-type E3 ubiquitin transferase SopA) (Salmonella outer protein A) (Secreted effector protein SopA)	Homo sapiens (Human)	Salmonella typhimurium (strain LT2 / SGSC1412 / ATCC 700720)	comigration in sds page	18066077
P62987	Q8ZNR3	UBA52	sopA	Ubiquitin-60S ribosomal protein L40 (CEP52) (Ubiquitin A-52 residue ribosomal protein fusion product 1) [Cleaved into: Ubiquitin; 60S ribosomal protein L40 (Large ribosomal subunit protein eL40)]	E3 ubiquitin-protein ligase SopA (EC 2.3.2.26) (HECT-type E3 ubiquitin transferase SopA) (Salmonella outer protein A) (Secreted effector protein SopA)	Homo sapiens (Human)	Salmonella typhimurium (strain LT2 / SGSC1412 / ATCC 700720)	comigration in sds page	18066077
Q9UBS4	Q8ZQQ2	DNAJB11	slrP	DnaJ homolog subfamily B member 11 (APOBEC1-binding protein 2) (ABBP-2) (DnaJ protein homolog 9) (ER-associated DNAJ) (ER-associated Hsp40 co-chaperone) (Endoplasmic reticulum DNA J domain-containing protein 3) (ER-resident protein ERdj3) (ERdj3) (ERj3p) (HEDJ) (Human DnaJ protein 9) (hDj-9) (PWP1-interacting protein 4)	E3 ubiquitin-protein ligase SlrP (EC 2.3.2.27) (RING-type E3 ubiquitin transferase SlrP) (Secreted effector protein SlrP)	Homo sapiens (Human)	Salmonella typhimurium (strain LT2 / SGSC1412 / ATCC 700720)	anti tag coimmunoprecipitation	20335166
Q9UBS4	Q8ZQQ2	DNAJB11	slrP	DnaJ homolog subfamily B member 11 (APOBEC1-binding protein 2) (ABBP-2) (DnaJ protein homolog 9) (ER-associated DNAJ) (ER-associated Hsp40 co-chaperone) (Endoplasmic reticulum DNA J domain-containing protein 3) (ER-resident protein ERdj3) (ERdj3) (ERj3p) (HEDJ) (Human DnaJ protein 9) (hDj-9) (PWP1-interacting protein 4)	E3 ubiquitin-protein ligase SlrP (EC 2.3.2.27) (RING-type E3 ubiquitin transferase SlrP) (Secreted effector protein SlrP)	Homo sapiens (Human)	Salmonella typhimurium (strain LT2 / SGSC1412 / ATCC 700720)	confocal microscopy	20335166
Q9UBS4	Q8ZQQ2	DNAJB11	slrP	DnaJ homolog subfamily B member 11 (APOBEC1-binding protein 2) (ABBP-2) (DnaJ protein homolog 9) (ER-associated DNAJ) (ER-associated Hsp40 co-chaperone) (Endoplasmic reticulum DNA J domain-containing protein 3) (ER-resident protein ERdj3) (ERdj3) (ERj3p) (HEDJ) (Human DnaJ protein 9) (hDj-9) (PWP1-interacting protein 4)	E3 ubiquitin-protein ligase SlrP (EC 2.3.2.27) (RING-type E3 ubiquitin transferase SlrP) (Secreted effector protein SlrP)	Homo sapiens (Human)	Salmonella typhimurium (strain LT2 / SGSC1412 / ATCC 700720)	pull down	20335166
Q9UBS4	Q8ZQQ2	DNAJB11	slrP	DnaJ homolog subfamily B member 11 (APOBEC1-binding protein 2) (ABBP-2) (DnaJ protein homolog 9) (ER-associated DNAJ) (ER-associated Hsp40 co-chaperone) (Endoplasmic reticulum DNA J domain-containing protein 3) (ER-resident protein ERdj3) (ERdj3) (ERj3p) (HEDJ) (Human DnaJ protein 9) (hDj-9) (PWP1-interacting protein 4)	E3 ubiquitin-protein ligase SlrP (EC 2.3.2.27) (RING-type E3 ubiquitin transferase SlrP) (Secreted effector protein SlrP)	Homo sapiens (Human)	Salmonella typhimurium (strain LT2 / SGSC1412 / ATCC 700720)	two hybrid	20335166
P60953	A0A0H3NA16	CDC42	sopB	Cell division control protein 42 homolog (G25K GTP-binding protein)	Type III secretion system effector protein. Activates Cdc42, RhoG, AktA and chloride secretion through its inositol phosphatase activity and disrupts tight junctions	Homo sapiens (Human)	Salmonella typhimurium (strain SL1344)	anti tag coimmunoprecipitation	21566117
P15924	A0A0H3NB75	DSP	sseG	Desmoplakin (DP) (250/210 kDa paraneoplastic pemphigus antigen)	Type III secretion system effector protein-modulates the positioning of the SCV	Homo sapiens (Human)	Salmonella typhimurium (strain SL1344)	anti tag coimmunoprecipitation	21566117
Q14444	A0A0H3NB75	CAPRIN1	sseG	Caprin-1 (Cell cycle-associated protein 1) (Cytoplasmic activation- and proliferation-associated protein 1) (GPI-anchored membrane protein 1) (GPI-anchored protein p137) (GPI-p137) (p137GPI) (Membrane component chromosome 11 surface marker 1) (RNA granule protein 105)	Type III secretion system effector protein-modulates the positioning of the SCV	Homo sapiens (Human)	Salmonella typhimurium (strain SL1344)	anti tag coimmunoprecipitation	21566117
P22059	A0A0H3NDL6	OSBP	sseL	Oxysterol-binding protein 1	Type III secretion system effector protein, deubiquitinase	Homo sapiens (Human)	Salmonella typhimurium (strain SL1344)	anti bait coimmunoprecipitation	21566117
P22059	A0A0H3NDL6	OSBP	sseL	Oxysterol-binding protein 1	Type III secretion system effector protein, deubiquitinase	Homo sapiens (Human)	Salmonella typhimurium (strain SL1344)	anti tag coimmunoprecipitation	21566117
O00170	A0A0H3NF38	AIP	sspH2	AH receptor-interacting protein (AIP) (Aryl-hydrocarbon receptor-interacting protein) (HBV X-associated protein 2) (XAP-2) (Immunophilin homolog ARA9)	Type III secretion system effector protein-E3 Ubiquitin ligase	Homo sapiens (Human)	Salmonella typhimurium (strain SL1344)	anti tag coimmunoprecipitation	21566117
O43684	A0A0H3NF38	BUB3	sspH2	Mitotic checkpoint protein BUB3	Type III secretion system effector protein-E3 Ubiquitin ligase	Homo sapiens (Human)	Salmonella typhimurium (strain SL1344)	anti bait coimmunoprecipitation	21566117
O43684	A0A0H3NF38	BUB3	sspH2	Mitotic checkpoint protein BUB3	Type III secretion system effector protein-E3 Ubiquitin ligase	Homo sapiens (Human)	Salmonella typhimurium (strain SL1344)	anti tag coimmunoprecipitation	21566117
O95816	A0A0H3NF38	BAG2	sspH2	BAG family molecular chaperone regulator 2 (BAG-2) (Bcl-2-associated athanogene 2)	Type III secretion system effector protein-E3 Ubiquitin ligase	Homo sapiens (Human)	Salmonella typhimurium (strain SL1344)	anti tag coimmunoprecipitation	21566117
P61981	A0A0H3NF38	YWHAG	sspH2	14-3-3 protein gamma (Protein kinase C inhibitor protein 1) (KCIP-1) [Cleaved into: 14-3-3 protein gamma, N-terminally processed]	Type III secretion system effector protein-E3 Ubiquitin ligase	Homo sapiens (Human)	Salmonella typhimurium (strain SL1344)	anti tag coimmunoprecipitation	21566117
Q9Y239	A0A0H3NF38	NOD1	sspH2	Nucleotide-binding oligomerization domain-containing protein 1 (Caspase recruitment domain-containing protein 4)	Type III secretion system effector protein-E3 Ubiquitin ligase	Homo sapiens (Human)	Salmonella typhimurium (strain SL1344)	anti tag coimmunoprecipitation	23935490
Q9Y2Z0	A0A0H3NF38	SUGT1	sspH2	Protein SGT1 homolog (Protein 40-6-3) (Sgt1) (Suppressor of G2 allele of SKP1 homolog)	Type III secretion system effector protein-E3 Ubiquitin ligase	Homo sapiens (Human)	Salmonella typhimurium (strain SL1344)	anti bait coimmunoprecipitation	21566117
Q9Y2Z0	A0A0H3NF38	SUGT1	sspH2	Protein SGT1 homolog (Protein 40-6-3) (Sgt1) (Suppressor of G2 allele of SKP1 homolog)	Type III secretion system effector protein-E3 Ubiquitin ligase	Homo sapiens (Human)	Salmonella typhimurium (strain SL1344)	anti bait coimmunoprecipitation	23935490
Q9Y2Z0	A0A0H3NF38	SUGT1	sspH2	Protein SGT1 homolog (Protein 40-6-3) (Sgt1) (Suppressor of G2 allele of SKP1 homolog)	Type III secretion system effector protein-E3 Ubiquitin ligase	Homo sapiens (Human)	Salmonella typhimurium (strain SL1344)	anti tag coimmunoprecipitation	21566117
Q9Y2Z0	A0A0H3NF38	SUGT1	sspH2	Protein SGT1 homolog (Protein 40-6-3) (Sgt1) (Suppressor of G2 allele of SKP1 homolog)	Type III secretion system effector protein-E3 Ubiquitin ligase	Homo sapiens (Human)	Salmonella typhimurium (strain SL1344)	anti tag coimmunoprecipitation	23935490
Q9Y2Z0	A0A0H3NF38	SUGT1	sspH2	Protein SGT1 homolog (Protein 40-6-3) (Sgt1) (Suppressor of G2 allele of SKP1 homolog)	Type III secretion system effector protein-E3 Ubiquitin ligase	Homo sapiens (Human)	Salmonella typhimurium (strain SL1344)	fluorescence microscopy	23935490
P14923	A0A0H3NG92	JUP	sseF	Junction plakoglobin (Catenin gamma) (Desmoplakin III) (Desmoplakin-3)	Type III secretion system effector protein-regulates and maintains the SCV	Homo sapiens (Human)	Salmonella typhimurium (strain SL1344)	anti tag coimmunoprecipitation	21566117
P63000	A0A0H3NGI8	RAC1	sopE	Ras-related C3 botulinum toxin substrate 1 (Cell migration-inducing gene 5 protein) (Ras-like protein TC25) (p21-Rac1)	Type III secretion system effector protein, invasion-associated secreted protein-by rearranging the actin cytoskeleton and disrupting tight junctions	Homo sapiens (Human)	Salmonella typhimurium (strain SL1344)	pull down	24625804
Q03135	A0A0H3NGI8	CAV1	sopE	Caveolin-1	Type III secretion system effector protein, invasion-associated secreted protein-by rearranging the actin cytoskeleton and disrupting tight junctions	Homo sapiens (Human)	Salmonella typhimurium (strain SL1344)	pull down	24625804
Q13153	A0A0H3NGI8	PAK1	sopE	Serine/threonine-protein kinase PAK 1 (EC 2.7.11.1) (Alpha-PAK) (p21-activated kinase 1) (PAK-1) (p65-PAK)	Type III secretion system effector protein, invasion-associated secreted protein-by rearranging the actin cytoskeleton and disrupting tight junctions	Homo sapiens (Human)	Salmonella typhimurium (strain SL1344)	pull down	24625804
P08134	A0A0H3NGY5	RHOC	sseJ	Rho-related GTP-binding protein RhoC (Rho cDNA clone 9) (h9)	Type III secretion system effector protein (SseJ)-antagonises the activity of SifA	Homo sapiens (Human)	Salmonella typhimurium (strain SL1344)	anti tag coimmunoprecipitation	21566117
P61586	A0A0H3NGY5	RHOA	sseJ	Transforming protein RhoA (Rho cDNA clone 12) (h12)	Type III secretion system effector protein (SseJ)-antagonises the activity of SifA	Homo sapiens (Human)	Salmonella typhimurium (strain SL1344)	anti tag coimmunoprecipitation	21566117
Q96A65	E1WAC8	EXOC4	sipC	Exocyst complex component 4 (Exocyst complex component Sec8)	Cell invasion protein SipC (Effector protein SipC)	Homo sapiens (Human)	Salmonella typhimurium (strain SL1344)	pull down	20579884
Q96KP1	E1WAC8	EXOC2	sipC	Exocyst complex component 2 (Exocyst complex component Sec5)	Cell invasion protein SipC (Effector protein SipC)	Homo sapiens (Human)	Salmonella typhimurium (strain SL1344)	pull down	20579884
Q9UPT5	E1WAC8	EXOC7	sipC	Exocyst complex component 7 (Exocyst complex component Exo70)	Cell invasion protein SipC (Effector protein SipC)	Homo sapiens (Human)	Salmonella typhimurium (strain SL1344)	pull down	20579884
Q9SUR9	A0A0H3NF38	SGT1A	sspH2	Protein SGT1 homolog A (AtSGT1a) (Suppressor of G2 allele of SKP1 homolog A)	Type III secretion system effector protein-E3 Ubiquitin ligase	Arabidopsis thaliana (Mouse-ear cress)	Salmonella typhimurium (strain SL1344)	anti tag coimmunoprecipitation	23935490
Q9SUT5	A0A0H3NF38	SGT1B	sspH2	Protein SGT1 homolog B (AtSGT1b) (Protein ENHANCED DOWNY MILDEW 1) (Protein ENHANCER OF TIR1-1 AUXIN RESISTANCE 3) (Suppressor of G2 allele of SKP1 homolog B)	Type III secretion system effector protein-E3 Ubiquitin ligase	Arabidopsis thaliana (Mouse-ear cress)	Salmonella typhimurium (strain SL1344)	anti tag coimmunoprecipitation	23935490
P29452	Q56134	Casp1	sipB	Caspase-1 (CASP-1) (EC 3.4.22.36) (Interleukin-1 beta convertase) (IL-1BC) (Interleukin-1 beta-converting enzyme) (ICE) (IL-1 beta-converting enzyme) (p45) [Cleaved into: Caspase-1 subunit p20; Caspase-1 subunit p10]	Cell invasion protein SipB (Effector protein SipB)	Mus musculus (Mouse)	Salmonella typhi	coimmunoprecipitation	10051653
P29452	Q56134	Casp1	sipB	Caspase-1 (CASP-1) (EC 3.4.22.36) (Interleukin-1 beta convertase) (IL-1BC) (Interleukin-1 beta-converting enzyme) (ICE) (IL-1 beta-converting enzyme) (p45) [Cleaved into: Caspase-1 subunit p20; Caspase-1 subunit p10]	Cell invasion protein SipB (Effector protein SipB)	Mus musculus (Mouse)	Salmonella typhi	pull down	10051653
O35250	E1WAC8	Exoc7	sipC	Exocyst complex component 7 (Exocyst complex component Exo70)	Cell invasion protein SipC (Effector protein SipC)	Mus musculus (Mouse)	Salmonella typhimurium (strain SL1344)	two hybrid	20579884
Q9JKK1	E1WAC8	Stx6	sipC	Syntaxin-6	Cell invasion protein SipC (Effector protein SipC)	Mus musculus (Mouse)	Salmonella typhimurium (strain SL1344)	anti bait coimmunoprecipitation	22190682
O84944	Q7BVH7	sseA	sseB	Type III secretion system chaperone SseA (TTSS chaperone SseA) (Secretion system effector A)	Secreted effector protein SseB (Secretion system effector B)	Salmonella typhimurium (strain LT2 / SGSC1412 / ATCC 700720)	Salmonella typhimurium (strain LT2 / SGSC1412 / ATCC 700720)	pull down	15256549
O84944	Q7BVH7	sseA	sseB	Type III secretion system chaperone SseA (TTSS chaperone SseA) (Secretion system effector A)	Secreted effector protein SseB (Secretion system effector B)	Salmonella typhimurium (strain LT2 / SGSC1412 / ATCC 700720)	Salmonella typhimurium (strain LT2 / SGSC1412 / ATCC 700720)	two hybrid	15256549
O84944	Q9R803	sseA	sseD	Type III secretion system chaperone SseA (TTSS chaperone SseA) (Secretion system effector A)	Secreted effector protein SseD (Secretion system effector D)	Salmonella typhimurium (strain LT2 / SGSC1412 / ATCC 700720)	Salmonella typhimurium (strain LT2 / SGSC1412 / ATCC 700720)	pull down	15256549
P0CL16	P74873	sicP	sptP	Chaperone protein sicP	Secreted effector protein SptP [Includes: GTPase-activating protein (GAP); Tyrosine-protein phosphatase (EC 3.1.3.48)]	Salmonella typhimurium (strain LT2 / SGSC1412 / ATCC 700720)	Salmonella typhimurium (strain LT2 / SGSC1412 / ATCC 700720)	x-ray crystallography	11689946
Q9R803	O84944	sseD	sseA	Secreted effector protein SseD (Secretion system effector D)	Type III secretion system chaperone SseA (TTSS chaperone SseA) (Secretion system effector A)	Salmonella typhimurium (strain LT2 / SGSC1412 / ATCC 700720)	Salmonella typhimurium (strain LT2 / SGSC1412 / ATCC 700720)	two hybrid	15256549
